# Supplementary material for: Use of PROMIS® to screen for depression in children with arthritis
Source: Springer Nature journal article supplement (doi:10.1186/s12969-020-00482-1), 2020-11-23
Supplement: MOESM1 [file 18615858]

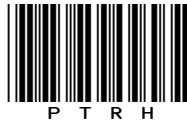

**To be completed by/for children aged 8-17 yrs**

Directions: Please fill in marks like this:  Not like this:

**Physical Function - Mobility**

| In the past 7 days...                                             | With No Trouble       | With a little trouble | With some trouble     | With a lot of trouble | Not able to do so     |
|-------------------------------------------------------------------|-----------------------|-----------------------|-----------------------|-----------------------|-----------------------|
| 1. I could do sports and exercise that other kids my age could do | <input type="radio"/> | <input type="radio"/> | <input type="radio"/> | <input type="radio"/> | <input type="radio"/> |
| 2. I could get up from the floor                                  | <input type="radio"/> | <input type="radio"/> | <input type="radio"/> | <input type="radio"/> | <input type="radio"/> |
| 3. I could walk upstairs without holding on to anything           | <input type="radio"/> | <input type="radio"/> | <input type="radio"/> | <input type="radio"/> | <input type="radio"/> |
| 4. I have been physically able to do the activities I enjoy most  | <input type="radio"/> | <input type="radio"/> | <input type="radio"/> | <input type="radio"/> | <input type="radio"/> |

**Anxiety**

| In the past 7 days...                       | Never                 | Almost Never          | Some times            | Often                 | Almost Always         |
|---------------------------------------------|-----------------------|-----------------------|-----------------------|-----------------------|-----------------------|
| 1. I felt like something awful might happen | <input type="radio"/> | <input type="radio"/> | <input type="radio"/> | <input type="radio"/> | <input type="radio"/> |
| 2. I felt nervous                           | <input type="radio"/> | <input type="radio"/> | <input type="radio"/> | <input type="radio"/> | <input type="radio"/> |
| 3. I felt worried                           | <input type="radio"/> | <input type="radio"/> | <input type="radio"/> | <input type="radio"/> | <input type="radio"/> |
| 4. I was afraid that I would make mistakes  | <input type="radio"/> | <input type="radio"/> | <input type="radio"/> | <input type="radio"/> | <input type="radio"/> |

**Depressive Symptoms**

| In the past 7 days...                      | Never                 | Almost Never          | Some times            | Often                 | Almost Always         |
|--------------------------------------------|-----------------------|-----------------------|-----------------------|-----------------------|-----------------------|
| 1. I felt everything in my life went wrong | <input type="radio"/> | <input type="radio"/> | <input type="radio"/> | <input type="radio"/> | <input type="radio"/> |
| 2. I felt lonely                           | <input type="radio"/> | <input type="radio"/> | <input type="radio"/> | <input type="radio"/> | <input type="radio"/> |
| 3. I felt sad                              | <input type="radio"/> | <input type="radio"/> | <input type="radio"/> | <input type="radio"/> | <input type="radio"/> |
| 4. I thought that my life was bad          | <input type="radio"/> | <input type="radio"/> | <input type="radio"/> | <input type="radio"/> | <input type="radio"/> |

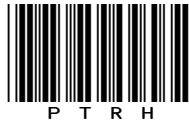

### Fatigue

| In the past 7 days...                                     | Never                 | Almost<br>Never       | Some<br>times         | Often                 | Almost<br>Always      |
|-----------------------------------------------------------|-----------------------|-----------------------|-----------------------|-----------------------|-----------------------|
| 1. Being tired made it hard to keep up with my schoolwork | <input type="radio"/> | <input type="radio"/> | <input type="radio"/> | <input type="radio"/> | <input type="radio"/> |
| 2. I got tired easily                                     | <input type="radio"/> | <input type="radio"/> | <input type="radio"/> | <input type="radio"/> | <input type="radio"/> |
| 3. I was too tired to do sports or exercise               | <input type="radio"/> | <input type="radio"/> | <input type="radio"/> | <input type="radio"/> | <input type="radio"/> |
| 4. I was too tired to enjoy the things I like to do       | <input type="radio"/> | <input type="radio"/> | <input type="radio"/> | <input type="radio"/> | <input type="radio"/> |

### Peer Relationships

| In the past 7 days...                     | Never                 | Almost<br>Never       | Some<br>times         | Often                 | Almost<br>Always      |
|-------------------------------------------|-----------------------|-----------------------|-----------------------|-----------------------|-----------------------|
| 1. I felt accepted by other kids my age   | <input type="radio"/> | <input type="radio"/> | <input type="radio"/> | <input type="radio"/> | <input type="radio"/> |
| 2. I was able to count on my friends      | <input type="radio"/> | <input type="radio"/> | <input type="radio"/> | <input type="radio"/> | <input type="radio"/> |
| 3. My friends and I helped each other out | <input type="radio"/> | <input type="radio"/> | <input type="radio"/> | <input type="radio"/> | <input type="radio"/> |
| 4. Other kids wanted to be my friend      | <input type="radio"/> | <input type="radio"/> | <input type="radio"/> | <input type="radio"/> | <input type="radio"/> |

### Pain Interference

| In the past 7 days...                                   | Never                 | Almost<br>Never       | Some<br>times         | Often                 | Almost<br>Always      |
|---------------------------------------------------------|-----------------------|-----------------------|-----------------------|-----------------------|-----------------------|
| 1. I had trouble sleeping when I had pain               | <input type="radio"/> | <input type="radio"/> | <input type="radio"/> | <input type="radio"/> | <input type="radio"/> |
| 2. It was hard for me to pay attention when I had pain  | <input type="radio"/> | <input type="radio"/> | <input type="radio"/> | <input type="radio"/> | <input type="radio"/> |
| 3. It was hard for me to run when I had pain            | <input type="radio"/> | <input type="radio"/> | <input type="radio"/> | <input type="radio"/> | <input type="radio"/> |
| 4. It was hard for me to walk one block when I had pain | <input type="radio"/> | <input type="radio"/> | <input type="radio"/> | <input type="radio"/> | <input type="radio"/> |

### Pain Intensity

|                                   |     |            |     |     |     |     |     |     |     |                                  |      |
|-----------------------------------|-----|------------|-----|-----|-----|-----|-----|-----|-----|----------------------------------|------|
| <b>In the past 7 days...</b>      |     | No<br>Pain |     |     |     |     |     |     |     | Worst pain<br>you can<br>imagine |      |
| How bad was your pain on average? | (0) | (1)        | (2) | (3) | (4) | (5) | (6) | (7) | (8) | (9)                              | (10) |

Signature: \_\_\_\_\_

Relationship to patient: \_\_\_\_\_

Date/Time: \_\_\_\_\_ Interpreter (as applicable): \_\_\_\_\_
